# Supplementary material for: Extraction-Free Absolute Quantification of Circulating miRNAs by Chip-Based Digital PCR
Source: MDPI journal article supplement (doi:10.3390/biomedicines10061354), 2022-06-08
Supplement: s1 [file s1]

## DATA SUPPLEMENT

### Extraction-free absolute quantification of circulating miRNAs by chip-based digital PCR

Yuri D'Alessandra<sup>1</sup>, Vincenza Valerio<sup>1</sup>, Donato Moschetta<sup>1,2</sup>, Ilaria Massaiu<sup>1</sup>, Michele Bozzi<sup>1</sup>, Maddalena Conte<sup>3,4</sup>,  
Valentina Parisi<sup>3</sup>, Michele Ciccarelli<sup>5</sup>, Dario Leosco<sup>3</sup>, Veronika A Myasoedova<sup>1</sup>, Paolo Poggio<sup>1,\*</sup>

<sup>1</sup> *Centro Cardiologico Monzino IRCCS, Milan, Italy*

<sup>2</sup> *Università degli Studi di Milano, Dipartimento di Scienze Farmacologiche e Biomolecolari, Milan, Italy*

<sup>3</sup> *University of Naples Federico II, Department of Translational Medical Sciences, Naples, Italy*

<sup>4</sup> *Casa di Cura San Michele, Maddaloni, Italy*

<sup>5</sup> *University of Salerno, Department of Medicine, Surgery and Dentistry, Fisciano, Campania, Italy*

*\* Correspondence*

*Paolo Poggio, Ph.D., Head of the Unit for the Study of Aortic, Valvular and Coronary Pathologies, Centro Cardiologico Monzino IRCCS, Via Parea 4, 20138, Milan, Italy.*

*Telephone: +39 02 5800 2853 Email: [paolo.poggio@cardiologicomonzino.it](mailto:paolo.poggio@cardiologicomonzino.it).*

**SUPPLEMENTARY TABLES**

**Supplementary Table S1:** miRNA used with respective mature sequence and manufacturer codes.

| miRNA           | Mature miRNA Sequence    | Assay ID   |
|-----------------|--------------------------|------------|
| cel-miR-54-3p   | UACCCGUAUUCUUCAUAAUCCGAG | 478410_mir |
| has-miR-1180-3p | UUUCCGGCUCGCGUGGGUGUGU   | 477869_mir |
| has-miR-128-3p  | UGGUUCUAGACUUGCCAACUA    | 477892_mir |
| has-miR-186-5p  | CAAAGAAUUCUCCUUUUGGGCU   | 477940_mir |
| has-miR-451a    | AAACCGUUACCAUUACUGAGUU   | 478107_mir |
| has-miR-15b-5p  | UAGCAGCACAUCAUGGUUUACA   | 478313_mir |
| has-miR-223-3p  | UGUCAGUUUGUCAAUACCCCA    | 477983_mir |

**Supplementary Table S2:** Digital PCR settings for miRNA detection in human plasma without RNA extraction.

| miRNA       | 1 to 100      |                |                |           |
|-------------|---------------|----------------|----------------|-----------|
|             | Log Copies/uL | Log 95% CI MAX | Log 95% CI MIN | Precision |
| miR-15b-5p  |               |                |                |           |
| miR-186-5p  | 3.794         | 3.806          | 3.787          | 2.08%     |
| miR-128-3p  | 3.000         | 3.016          | 2.981          | 4.29%     |
| miR-451a    | 4.371         | 4.381          | 4.362          | 2.29%     |
| miR-223-3p  | 4.644         | 4.665          | 4.622          | 5.07%     |
| miR-1180-3p | 2.374         | 2.409          | 2.338          | 8.50%     |
| miRNA       | 1 to 1000     |                |                |           |
|             | Log Copies/uL | Log 95% CI MAX | Log 95% CI MIN | Precision |
| miR-15b-5p  | 4.588         | 4.598          | 4.578          | 2.40%     |
| miR-186-5p  | 3.809         | 3.834          | 3.791          | 5.25%     |
| miR-128-3p  | 3.074         | 3.123          | 3.025          | 11.92%    |
| miR-451a    | 4.380         | 4.392          | 4.368          | 2.81%     |
| miR-223-3p  | 4.721         | 4.731          | 4.712          | 2.13%     |
| miR-1180-3p | 2.320         | 2.439          | 2.201          | 31.58%    |
| miRNA       | 1 to 10000    |                |                |           |
|             | Log Copies/uL | Log 95% CI MAX | Log 95% CI MIN | Precision |
| miR-15b-5p  | 4.632         | 4.659          | 4.606          | 6.24%     |
| miR-186-5p  | 3.809         | 3.881          | 3.738          | 17.88%    |
| miR-128-3p  | 3.032         | 3.198          | 2.865          | 46.87%    |
| miR-451a    | 4.430         | 4.463          | 4.397          | 7.92%     |
| miR-223-3p  | 4.709         | 4.733          | 4.684          | 5.83%     |
| miR-1180-3p |               |                |                |           |

Data are indicated as mean Log<sub>10</sub>(miRNA copy number/μl sample).

**Supplementary Table S3:** Detection of expression levels of low-abundance miR-186-5p, and miR-1180-3p is highly consistent at different times across multiple samples.

| miR-186-5p  | Log10               |                     |                     | Log10 |      |      |
|-------------|---------------------|---------------------|---------------------|-------|------|------|
|             | 1 <sup>st</sup> Run | 2 <sup>nd</sup> Run | 3 <sup>rd</sup> Run | Mean  | STD  | CV   |
| HS1         | 4.31                | 4.52                | 4.46                | 4.43  | 0.11 | 2.50 |
| HS2         | 3.58                | 3.85                | 3.81                | 3.75  | 0.15 | 3.88 |
| HS3         | 4.09                | 4.28                | 4.27                | 4.21  | 0.11 | 2.57 |
| HS4         | 4.31                | 4.60                | 4.48                | 4.46  | 0.14 | 3.24 |
| HS5         | 4.43                | 4.63                | 4.71                | 4.59  | 0.14 | 3.10 |
| miR-1180-3p | Log10               |                     |                     | Log10 |      |      |
|             | 1 <sup>st</sup> Run | 2 <sup>nd</sup> Run | 3 <sup>rd</sup> Run | Mean  | STD  | CV   |
| HS1         | 2.34                | 2.47                | 2.49                | 2.43  | 0.08 | 3.42 |
| HS2         | 2.11                | 2.18                | 2.16                | 2.15  | 0.04 | 1.73 |
| HS3         | 2.28                | 2.43                | 2.37                | 2.36  | 0.08 | 3.18 |
| HS4         | 3.34                | 3.57                | 3.43                | 3.45  | 0.12 | 3.42 |
| HS5         | 3.16                | 3.31                | 3.32                | 3.26  | 0.09 | 2.76 |

Data are indicated as mean Log10(miRNA copy number/ $\mu$ l sample). STD = Standard deviation; CV = Coefficient of variation.

## SUPPLEMENTARY FIGURE

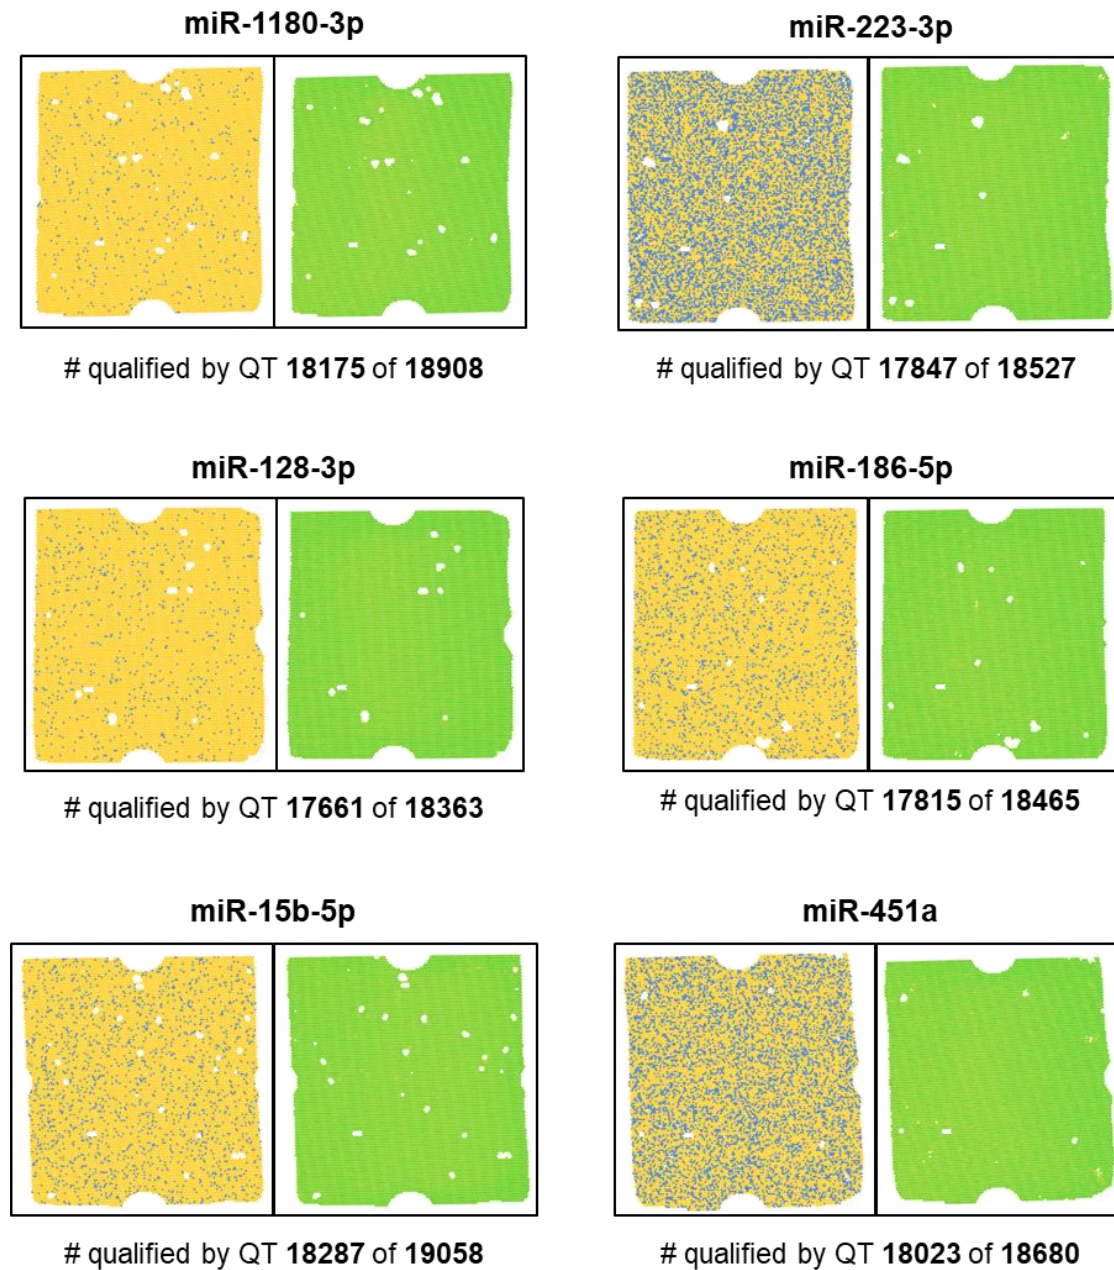

**Supplementary Figure S1:** miRNA detection in human plasma by digital PCR. The images represent the assay results on > 15,000 nano-wells in the FAM fluorescent channel. The yellow background and dots show the negative nano-wells (without fluorescence), while the blue dots indicate the positive nano-wells (with fluorescence). The green background indicates the goodness of the quality score. # qualified by QT indicates the number of nano-wells with good quality (first number, threshold = 0.6) and the number of all filled nano-wells (second number). The total number of nano-wells per chip is 20000.
